# Supplementary material for: Data-mining fluoride-based solid-state electrolytes for monovalent metal batteries
Source: Royal Society of Chemistry journal article supplement (doi:10.1039/d4ta04553j), 2024-01-01
Supplement: d4ta04553j1.pdf [file d4ta04553j1.pdf]

# Data-mining Fluoride-Based Solid-State Electrolytes for Monovalent Metal Batteries

Gunyoung Heo,<sup>†</sup> Aloysius Soon,<sup>\*,†,‡</sup> and Taehun Lee<sup>\*,¶,§</sup>

<sup>†</sup>*Department of Materials Science & Engineering, Yonsei University, Seoul 03722,  
Republic of Korea*

<sup>‡</sup>*School of Physics, University of Sydney, Sydney 2006, NSW, Australia*

<sup>¶</sup>*Division of Advanced Materials Engineering, Jeonbuk National University, Jeonju 54896,  
Republic of Korea*

<sup>§</sup>*Hydrogen and Fuel Cell Research Center, Jeonbuk National University, Jeonju, 54896,  
Republic of Korea*

E-mail: aloysius.soon@yonsei.ac.kr; taehun.lee@jbnu.ac.kr

# Figures

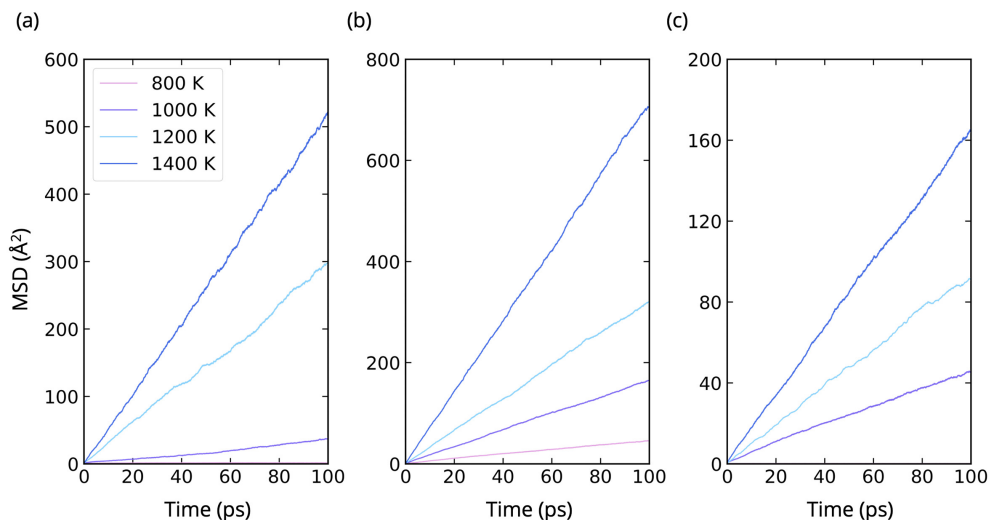

Figure S1: Mean square displacement (MSD) of Li-ion from machine-learned MD simulations over the last 100 ps for Na-based fluorides at various temperatures (800, 1,000, 1,200, and 1,400 K): (a)  $\text{KLiBeF}_4$ , (b)  $\text{Li}_3\text{ScF}_6$  and (c)  $\text{NaLiHo}_2\text{F}_8$ .

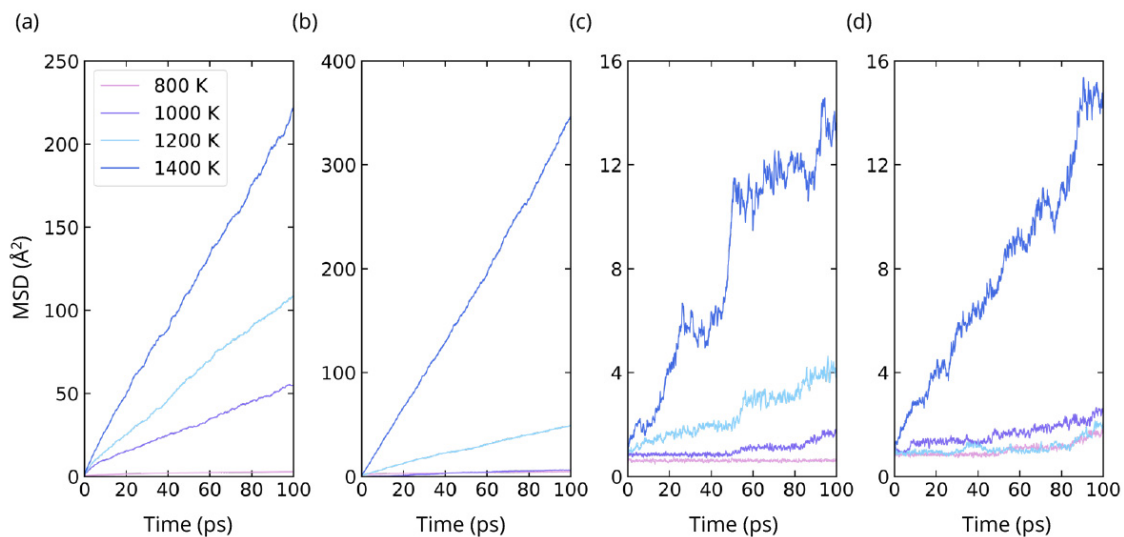

Figure S2: Mean square displacement (MSD) of Na-ion from machine-learned MD simulations over the last 100 ps for Na-based fluorides at various temperatures (800, 1,000, 1,200, and 1,400 K): (a)  $\text{Na}_2\text{BeF}_4$ , (b)  $\text{Na}_3\text{HfF}_7$ , (c)  $\text{NaGdF}_4$ , and (d)  $\text{NaPrF}_4$ .

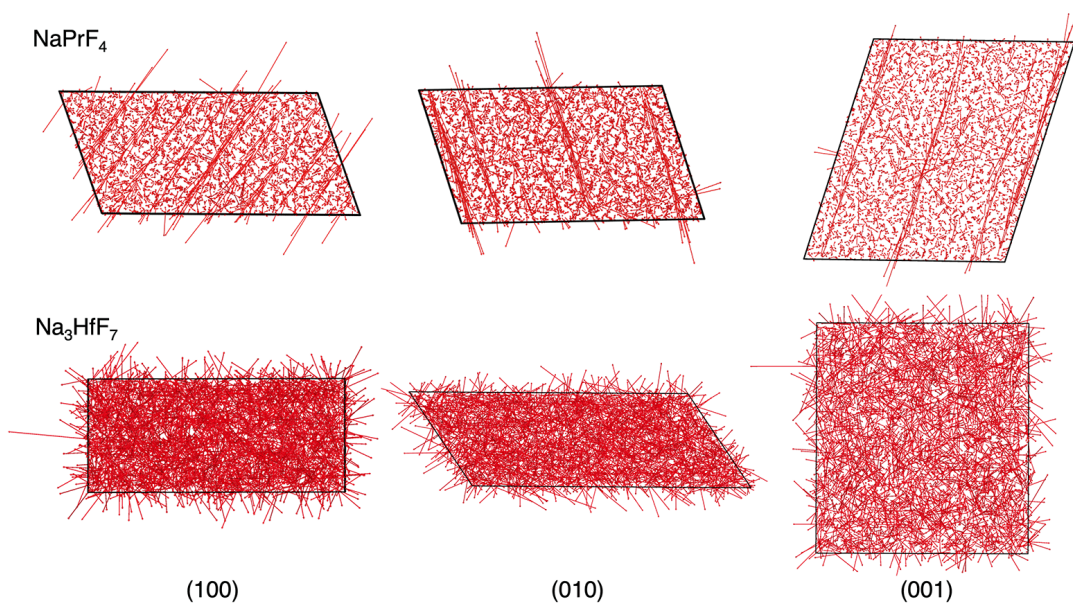

Figure S3: Na-ion diffusion topologies in the supercells of NaPrF<sub>4</sub> and Na<sub>3</sub>HfF<sub>6</sub> obtained from the MD trajectory at 1,000 K. The displacement vectors of Na ions are projected with red solid lines within specific crystallographic planes.

# Tables

Table S1: Physiochemical information of Li-based fluoride as the final SSE candidates for LMB obtained through the screening process and MD calculations: compositions, Materials Project-ID (MP-ID), electrochemical stability windows (reduction limit ( $V_{\text{red}}$ ) and oxidation limit ( $V_{\text{ox}}$ )), Pugh ratios ( $P$ ) with their corresponding elastic bulk ( $K$ ) and shear moduli ( $G$ ), and activation barriers ( $E_a$ ) for Li-ion diffusivity for selected candidates which show appreciable ionic diffusion at 1,000 K.

| Material                           | MP-ID      | $V_{\text{red}} - V_{\text{ox}}$ (V) | $P$  | $K$ (GPa) | $G$ (G Pa) | $E_a$ (eV) |
|------------------------------------|------------|--------------------------------------|------|-----------|------------|------------|
| KLiBeF <sub>4</sub>                | mp-6253    | 0.9 – 6.1                            | 1.76 | 32.45     | 57.02      | 1.58       |
| Li <sub>3</sub> ScF <sub>6</sub>   | mp-560890  | 0.4 – 6.2                            | 1.75 | 39.26     | 68.75      | 0.43       |
| NaLiHo <sub>2</sub> F <sub>8</sub> | mp-1210008 | 0.5 – 6.0                            | 2.46 | 49.87     | 122.79     | 1.51       |
| K <sub>2</sub> LiScF <sub>6</sub>  | mp-1111110 | 0.4 – 6.1                            | 1.91 | 35.07     | 67.02      | -          |
| LiYF <sub>4</sub>                  | mp-556472  | 0.4 – 6.5                            | 1.91 | 52.22     | 99.99      | -          |
| Rb <sub>2</sub> LiYF <sub>6</sub>  | mp-1114432 | 0.6 – 5.7                            | 2.23 | 27.97     | 62.40      | -          |
| Rb <sub>2</sub> LiScF <sub>6</sub> | mp-1114702 | 0.5 – 5.8                            | 2.12 | 31.60     | 66.91      | -          |
| NaLiEr <sub>2</sub> F <sub>8</sub> | mp-1209986 | 0.4 – 6.5                            | 2.48 | 48.80     | 120.79     | -          |
| LiLuF <sub>4</sub>                 | mp-561430  | 0.3 – 6.8                            | 2.41 | 57.34     | 137.98     | -          |
| NaLiLu <sub>2</sub> F <sub>8</sub> | mp-1209991 | 0.5 – 7.3                            | 2.47 | 51.63     | 127.70     | -          |
| NaLiTm <sub>2</sub> F <sub>8</sub> | mp-1210006 | 0.4 – 8.0                            | 2.46 | 51.14     | 125.95     | -          |

Table S2: Physiochemical information of Na-based fluoride as the final SSE candidates for NMB obtained through the screening process and MD calculations: compositions, Materials Project-ID (MP-ID), electrochemical stability windows (reduction limit ( $V_{\text{red}}$ ) and oxidation limit ( $V_{\text{ox}}$ )), Pugh ratios ( $P$ ) with their corresponding elastic bulk ( $K$ ) and shear moduli ( $G$ ), and activation barriers ( $E_a$ ) for Na-ion diffusivity for selected candidates which show appreciable ionic diffusion at 1,000 K.

| Material                                                          | MP-ID      | $V_{\text{red}} - V_{\text{ox}}$ (V) | $P$  | $K$ (GPa) | $G$ (GPa) | $E_a$ (eV) |
|-------------------------------------------------------------------|------------|--------------------------------------|------|-----------|-----------|------------|
| NaGdF <sub>4</sub>                                                | mp-1221034 | 0.1 – 7.1                            | 2.55 | 46.18     | 117.94    | 0.62       |
| Na <sub>2</sub> BeF <sub>4</sub>                                  | mp-3318    | 0.4 – 6.2                            | 1.81 | 36.12     | 65.39     | 0.77       |
| Na <sub>3</sub> HfF <sub>7</sub>                                  | mp-34579   | 0.1 – 6.3                            | 2.02 | 37.21     | 75.27     | 0.74       |
| NaPrF <sub>4</sub>                                                | mp-1220948 | 0.1 – 6.2                            | 2.50 | 42.78     | 106.85    | 0.04       |
| Na <sub>3</sub> ScF <sub>6</sub>                                  | mp-1113433 | 0.1 – 6.0                            | 1.93 | 36.29     | 70.30     | -          |
| K <sub>2</sub> NaAlF <sub>6</sub>                                 | mp-6586    | 0.3 – 6.2                            | 1.98 | 32.90     | 65.43     | -          |
| Na <sub>2</sub> MgScF <sub>7</sub>                                | mp-1210466 | 0.3 – 6.0                            | 1.98 | 38.48     | 76.44     | -          |
| K <sub>3</sub> NaBe <sub>2</sub> F <sub>8</sub>                   | mp-1211627 | 0.4 – 5.8                            | 1.92 | 30.61     | 58.95     | -          |
| Na <sub>2</sub> ThF <sub>6</sub>                                  | mp-4829    | 0.2 – 6.0                            | 2.33 | 38.77     | 90.64     | -          |
| NaYF <sub>4</sub>                                                 | mp-1220682 | 0.1 – 6.1                            | 2.01 | 44.42     | 89.39     | -          |
| NaHoF <sub>4</sub>                                                | mp-1220708 | 0.1 – 6.1                            | 2.51 | 46.00     | 115.60    | -          |
| NaSmF <sub>4</sub>                                                | mp-1220915 | 0.1 – 6.0                            | 2.48 | 46.69     | 116.18    | -          |
| NaErF <sub>4</sub>                                                | mp-1221036 | 0.1 – 6.1                            | 2.51 | 47.69     | 119.72    | -          |
| NaMgF <sub>3</sub>                                                | mp-2955    | 0.1 – 6.0                            | 2.02 | 38.09     | 77.01     | -          |
| Rb <sub>2</sub> NaAlF <sub>6</sub>                                | mp-1079583 | 0.3 – 5.8                            | 2.20 | 29.38     | 64.77     | -          |
| Rb <sub>3</sub> NaBe <sub>2</sub> F <sub>8</sub>                  | mp-13630   | 0.3 – 5.5                            | 2.15 | 26.62     | 57.37     | -          |
| Rb <sub>2</sub> NaErF <sub>6</sub>                                | mp-13815   | 0.1 – 5.6                            | 2.63 | 24.88     | 65.62     | -          |
| K <sub>2</sub> NaScF <sub>6</sub>                                 | mp-6058    | 0.1 – 5.8                            | 2.01 | 29.31     | 59.09     | -          |
| Rb <sub>2</sub> NaHoF <sub>6</sub>                                | mp-15318   | 0.1 – 5.8                            | 2.63 | 24.64     | 65.04     | -          |
| NaPaO <sub>3</sub>                                                | mp-865120  | 0.1 – 4.9                            | 2.03 | 62.15     | 126.69    | -          |
| NaLiLu <sub>2</sub> F <sub>8</sub>                                | mp-1209991 | 0.1 – 6.4                            | 2.47 | 51.63     | 127.69    | -          |
| NaNd <sub>9</sub> (Si <sub>3</sub> O <sub>13</sub> ) <sub>2</sub> | mp-1221031 | 0.2 – 4.0                            | 2.08 | 80.52     | 167.82    | -          |
| NaLiTm <sub>2</sub> F <sub>8</sub>                                | mp-1210006 | 0.1 – 8.0                            | 2.46 | 51.14     | 125.94    | -          |

Table S3: Calculated Li and Na-ion diffusivity ( $D$ ) in ( $10^{-7}$  cm<sup>2</sup> S<sup>-1</sup>) of selected candidates for LMB and NMB for each temperature (1,400 K, 1,200 K, 1,000 K, and 800 K).

| System | Material                           | $D_{1400}$ | $D_{1200}$ | $D_{1000}$ | $D_{800}$ |
|--------|------------------------------------|------------|------------|------------|-----------|
| LMB    | KLiBeF <sub>4</sub>                | 835.6      | 505.8      | 222.3      | 1.4       |
| LMB    | Li <sub>3</sub> ScF <sub>6</sub>   | 1192.8     | 535.4      | 272.0      | 73.9      |
| LMB    | NaLiHo <sub>2</sub> F <sub>8</sub> | 346.4      | 5.46       | 2.2        | 1.8       |
| NMB    | NaGdF <sub>4</sub>                 | 9.2        | 5.8        | 1.2        | 0.1       |
| NMB    | Na <sub>2</sub> BeF <sub>4</sub>   | 348.7      | 177.4      | 83.8       | 3.5       |
| NMB    | Na <sub>3</sub> HfF <sub>7</sub>   | 575.1      | 76.0       | 6.1        | 5.3       |
| NMB    | NaPrF <sub>4</sub>                 | 22.2       | 4.27       | 2.73       | 2.57      |

Table S4: Physiochemical information of Li-based archetype and prepared Li-based chlorides (abbreviated as “prepared”) SSE materials for LMB: compositions, Materials Project-ID (MP-ID), electrochemical stability windows (reduction limit ( $V_{\text{red}}$ ) and oxidation limit ( $V_{\text{ox}}$ )), Pugh ratios ( $P$ ) with their corresponding elastic bulk ( $K$ ) and shear moduli ( $G$ ), and activation barriers ( $E_a$ ). The values of  $E_a$  are taken from previous theoretical studies.

| Type             | Material                   | MP-ID     | $V_{\text{red}} - V_{\text{ox}}$ (V) | $P$  | $K$ (GPa) | $G$ (GPa) | $E_a$ (eV) |
|------------------|----------------------------|-----------|--------------------------------------|------|-----------|-----------|------------|
| <i>Archetype</i> | LLZO                       | mp-6253   | 0.1 – 3.1                            | 1.57 | 80.91     | 127.36    | 0.61 [ 1 ] |
| <i>Archetype</i> | $\text{Li}_3\text{PO}_4$   | mp-560890 | 0.7 – 4.1                            | 1.22 | 72.78     | 88.80     | 0.60 [ 2 ] |
| <i>Prepared</i>  | $\text{LiAlCl}_4$          | mp-22983  | 1.6 – 4.4                            | 2.49 | 12.70     | 31.66     | 0.47 [ 3 ] |
| <i>Prepared</i>  | $\text{Li}_3\text{ErCl}_6$ | mp-676361 | 0.8 – 4.2                            | 2.46 | 19.22     | 47.19     | 0.47 [ 4 ] |
| <i>Prepared</i>  | $\text{Li}_3\text{InCl}_6$ | mp-676109 | 2.3 – 4.4                            | 2.45 | 14.80     | 36.30     | 0.34 [ 5 ] |

Table S5: Physiochemical information of Na-based archetype and prepared Na-based chlorides (abbreviated as “prepared”) SSE materials for LMB: compositions, Materials Project-ID (MP-ID), electrochemical stability windows (reduction limit ( $V_{\text{red}}$ ) and oxidation limit ( $V_{\text{ox}}$ )), Pugh ratios ( $P$ ) with their corresponding elastic bulk ( $K$ ) and shear moduli ( $G$ ), and activation barriers ( $E_a$ ). The values of  $E_a$  are taken from previous theoretical studies.

| Type             | Material                                          | MP-ID      | $V_{\text{red}} - V_{\text{ox}}$ (V) | $P$  | $K$ (GPa) | $G$ (GPa) | $E_a$ (eV)  |
|------------------|---------------------------------------------------|------------|--------------------------------------|------|-----------|-----------|-------------|
| <i>Archetype</i> | $\text{Na}_3\text{Zr}_2\text{Si}_2\text{PO}_{12}$ | mp-1221034 | 1.2 – 3.3                            | 1.50 | 63.04     | 94.78     | 0.28 [ 6 ]  |
| <i>Archetype</i> | $\text{Na}_3\text{PS}_4$                          | mp-3318    | 1.3 – 2.1                            | 1.62 | 22.65     | 36.70     | 0.54 [ 7 ]  |
| <i>Prepared</i>  | $\text{NaAlCl}_4$                                 | mp-23363   | 1.6 – 4.2                            | 2.76 | 11.33     | 31.30     | 0.42 [ 8 ]  |
| <i>Prepared</i>  | $\text{Na}_3\text{ErCl}_6$                        | mp-28542   | 0.6 – 3.7                            | 2.84 | 14.17     | 40.27     | 0.65 [ 9 ]  |
| <i>Prepared</i>  | $\text{Na}_3\text{InCl}_6$                        | mp-23503   | 2.2 – 4.0                            | 2.82 | 10.98     | 30.96     | 0.70 [ 10 ] |

## References

- (1) Glass-Type Polyamorphism in Li-Garnet Thin Film Solid State Battery Conductors. *Adv. Energy Mater.* **2018**, *8*, 1702265.
- (2) Kuwata, N.; Iwagami, N.; Matsuda, Y.; Tanji, Y.; Kawamura, J. Thin Film Batteries with  $\text{Li}_3\text{PO}_4$  Solid Electrolyte Fabricated by Pulsed Laser Deposition. *ECS Trans.* **2009**, *16*, 53.
- (3) Weppner, W.; Huggins, R. Ionic Conductivity of Solid and Liquid  $\text{LiAlCl}_4$ . *J. Electrochem. Soc.* **1977**, *124*, 35.
- (4) Schlem, R.; Bernges, T.; Li, C.; Kraft, M. A.; Minafra, N.; Zeier, W. G. Lattice Dynamical Approach for Finding the Lithium Superionic Conductor  $\text{Li}_3\text{ErIn}_6$ . *ACS Appl. Energy Mater.* **2020**, *3*, 3684–3691.
- (5) Li, X. et al. Air-Stable  $\text{Li}_3\text{InCl}_6$  Electrolyte with High Voltage Compatibility for All-Solid-State Batteries. *Energy Environ. Sci.* **2019**, *12*, 2665–2671.
- (6) Park, H.; Jung, K.; Nezafati, M.; Kim, C.-S.; Kang, B. Sodium Ion Diffusion in Nasicon ( $\text{Na}_3\text{Zr}_2\text{Si}_2\text{PO}_{12}$ ) Solid Electrolytes: Effects of Excess Sodium. *ACS Appl. Mater. Interfaces* **2016**, *8*, 27814–27824.
- (7) Zhu, Z.; Chu, I.-H.; Deng, Z.; Ong, S. P. Role of  $\text{Na}^+$  Interstitials and Dopants in Enhancing the  $\text{Na}^+$  Conductivity of the Cubic  $\text{Na}_3\text{PS}_4$  Superionic Conductor. *Chem. Mater* **2015**, *27*, 8318–8325.
- (8) Park, J.; Son, J. P.; Ko, W.; Kim, J.-S.; Choi, Y.; Kim, H.; Kwak, H.; Seo, D.-H.; Kim, J.; Jung, Y. S.  $\text{NaAlCl}_4$ : New Halide Solid Electrolyte for 3 V Stable Cost-Effective All-Solid-State Na-Ion Batteries. *ACS Energy Lett.* **2022**, *7*, 3293–3301.
- (9) Park, D.; Kim, K.; Chun, G. H.; Wood, B. C.; Shim, J. H.; Yu, S. Materials design of



sodium chloride solid electrolytes  $\text{Na}_3\text{MCl}_6$  for all-solid-state sodium-ion batteries. *J. Mater. Chem. A* **2021**, *9*, 23037–23045.

- (10) Zhao, T.; Kraft, M. A.; Zeier, W. G. Synthesis-Controlled Polymorphism and Anion Solubility in the Sodium-Ion Conductor  $\text{Na}_3\text{InCl}_{6-x}\text{Br}_x$  ( $0 \leq x \leq 2$ ). *Inorg. Chem.* **2023**, *62*, 11737–11745.
